# Supplementary material for: Acid catalysed cross-linking of poly vinyl alcohol (PVA) by glutaraldehyde: effect of crosslink density on the characteristics of PVA membranes used in single chambered microbial fuel cells
Source: Royal Society of Chemistry journal article supplement (doi:10.1039/c5ra16068e), 2015-01-01
Supplement: c5ra16068e1.pdf [file c5ra16068e1.pdf]

## Electronic Supplementary Information (ESI)

**Acid catalysed cross-linking of poly vinyl alcohol (PVA) by glutaraldehyde: Effect of crosslink density on the characteristics of PVA membrane used in single chambered microbial fuel cell**

Ruchira rudra<sup>a</sup>, Vikash Kumar<sup>a</sup>, Patit Paban Kundu\*

Advanced Polymer Laboratory, Department of Polymer Science & Technology, 92 A. P. C. Road, University of Calcutta, Kolkata-700009.

\*Corresponding author Fax & Tel: 91-33-2352-510;

E-mail: [ppk923@yahoo.com](mailto:ppk923@yahoo.com)

### ESI S1: Cell performances at different resistances

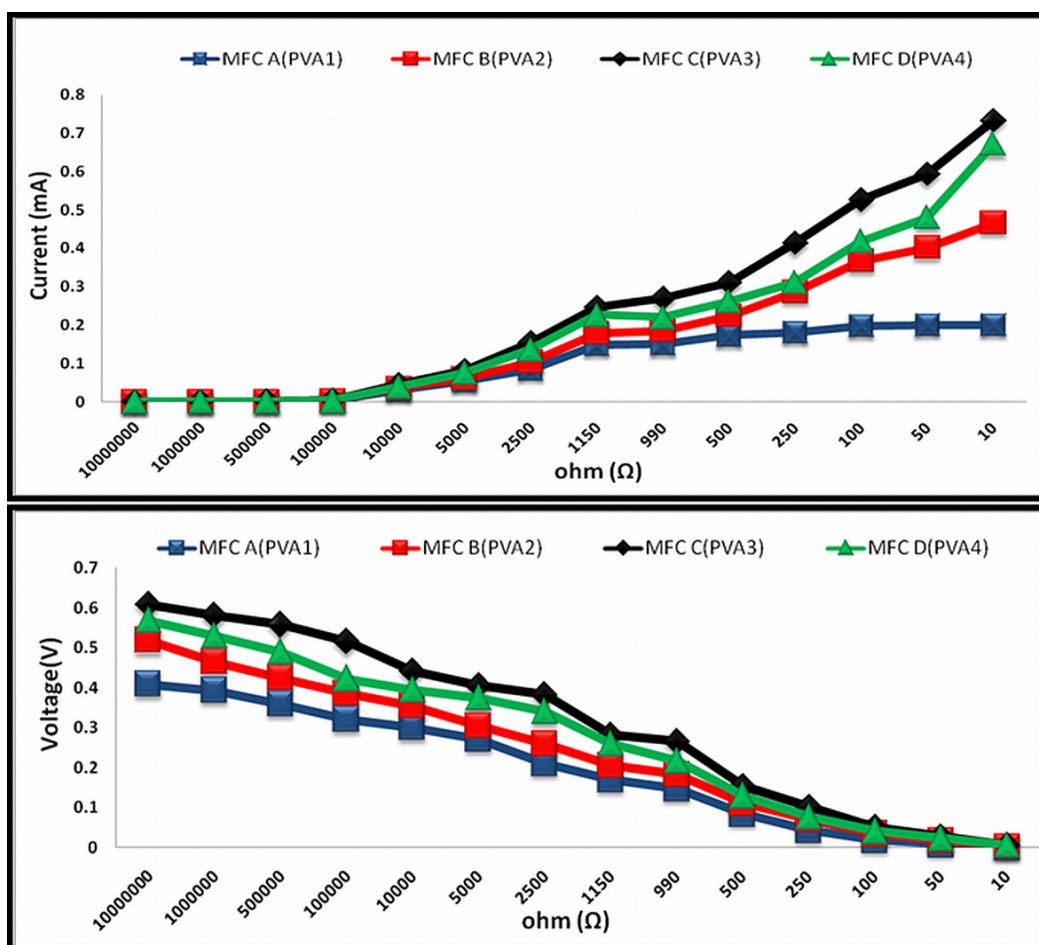

**Fig. ESI S2. Equivalent circuit representing ohmic resistance ( $R_m$ ).**

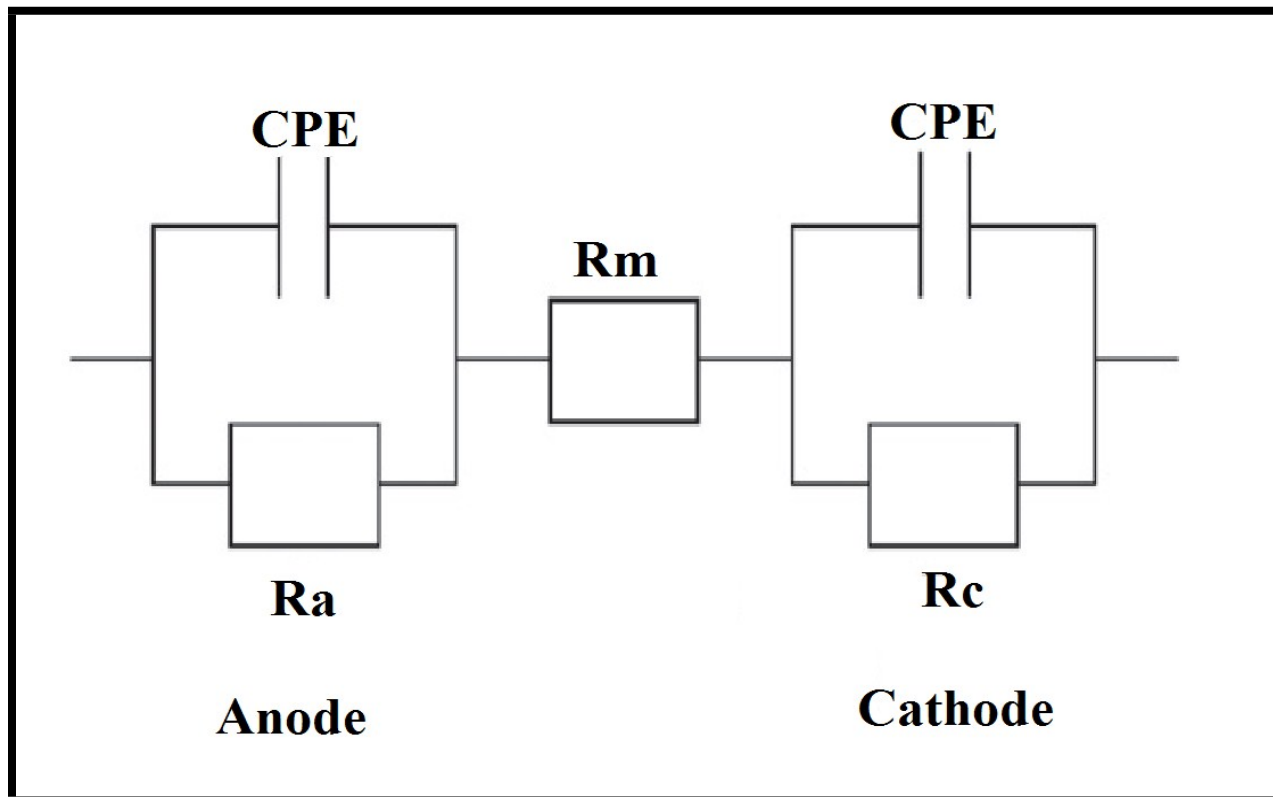

**Fig. ESI S3. Schematic illustration for proton conductivity measurement.**

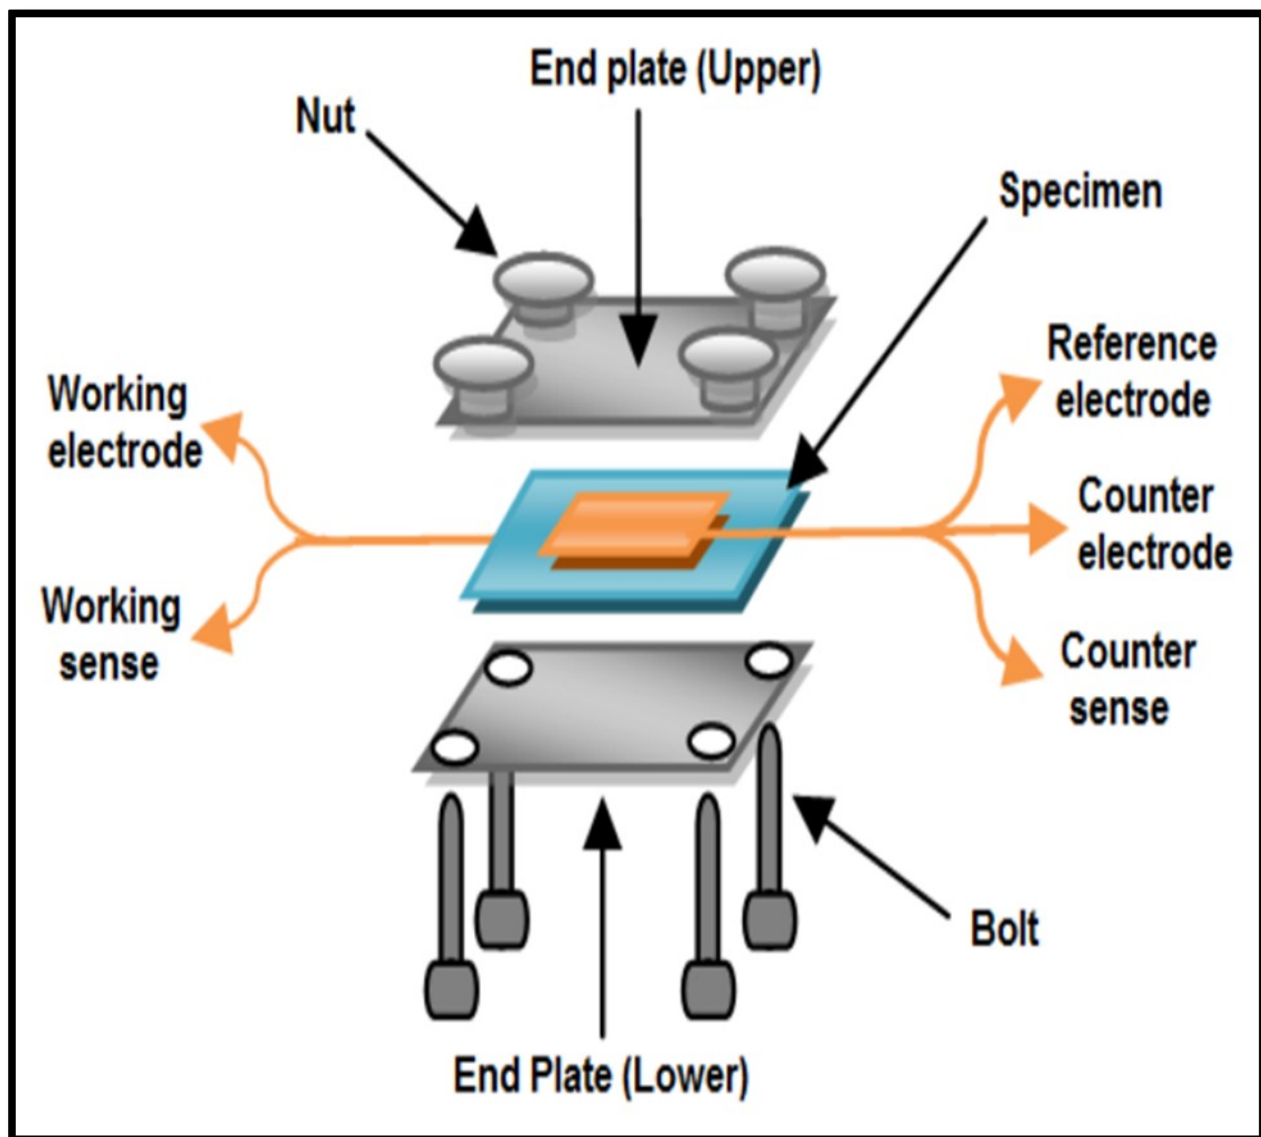

## ESI Table 1: A comparative study of MFCs in terms of power generation using different membranes

| <u>MFC Type</u>                          | <u>Electrodes</u> | <u>Used Membranes</u>                             | <u>Maximum Power density</u>  | <u>References</u> |
|------------------------------------------|-------------------|---------------------------------------------------|-------------------------------|-------------------|
| Dual chamber with oxygen flow at cathode | Carbon papers     | Nafion 117                                        | 600 mWm <sup>-2</sup>         | 1                 |
| Air cathode MFC                          | Carbon Brush      | Glass fibers                                      | 240±22 mWm <sup>-2</sup>      | 2                 |
|                                          | Carbon Mesh       | Coated Glass fibers                               | 230 ± 3.3 mWm <sup>-2</sup>   |                   |
| Air cathode MFC                          | Carbon papers     | Nafion 117                                        | 239.4 mWm <sup>-2</sup>       | 3                 |
| Air cathode MFC                          | Carbon papers     | SPEEK/PES                                         | 170 mWm <sup>-2</sup>         | 4                 |
| Dual chamber                             | Graphite Plates   | Fe <sub>3</sub> O <sub>4</sub> /PES nanocomposite | 20 mWm <sup>-2</sup>          | 5                 |
| Single chamber (tubular) MFC             | Carbon cloths     | GO-PVA-STA composite                              | 139 mWm <sup>-2</sup>         | 6                 |
| Air cathode MFC                          | Carbon cloths     | Crosslinked PVA membranes                         | 119.38 ± 12 mWm <sup>-2</sup> | Present study     |

### References:

1. Prakash GKS, Viva FA, Bretschger O, Yang B, El-Naggar M, Neelson K. Inoculation procedures and characterization of membrane electrode assemblies for microbial fuel cells. *J Power Sources* 2010; 195:111–7.
2. Hays S, Zhang F, Logan BE. Performance of two different types of anodes in membrane electrode assembly microbial fuel cells for power generation from domestic wastewater. *J Power Sources* 2011; 196:8293–300.
3. Lu N, Zhou SG, Zhuang L, Zhang JT, Ni JR. Electricity generation from starch processing waste-water using microbial fuel cell technology. *Biochem Eng J* 2009; 43:246–51.
4. Lim, S. S.; Daud, W. R. W.; Md Jahim, J.; Ghasemi, M.; Chong, P. S.; Ismail, M. Sulfonated Poly(ether Ether Ketone)/poly(ether Sulfone) Composite Membranes as an Alternative Proton Exchange Membrane in Microbial Fuel Cells. *International Journal of Hydrogen Energy* 2012, 37, 11409–11424.
5. Rahimnejad, M.; Ghasemi, M.; Najafpour, G. D.; Ismail, M.; Mohammad, A. W.; Ghoreyshi, A. A.; Hassan, S. H. A. Synthesis, Characterization and Application Studies of Self-made Fe<sub>3</sub>O<sub>4</sub>/PES Nanocomposite Membranes in Microbial Fuel Cell. *Electrochimica Acta* 2012, 85, 700–706.
6. Santimoy Khilari, Soumya Pandit, Makarand M. Ghangrekar, Debabrata Pradhan, Debabrata Das, Graphene oxide impregnated PVA-STA composite polymer electrolyte membrane separator for power generation in single chambered Microbial Fuel Cell. *Industrial & Engineering Chemistry Research* 2013, 52, 11597–11606.
